# Supplementary material for: Human Chorionic Gonadotropin-Mediated Induction of Breast Cancer Cell Proliferation and Differentiation
Source: PubMed Central journal article supplement (PMC7911704; doi:10.3390/cells10020264), 2021-01-29
Supplement: cells-10-00264-s001.pdf [file cells-10-00264-s001.pdf]

**Supplementary:**

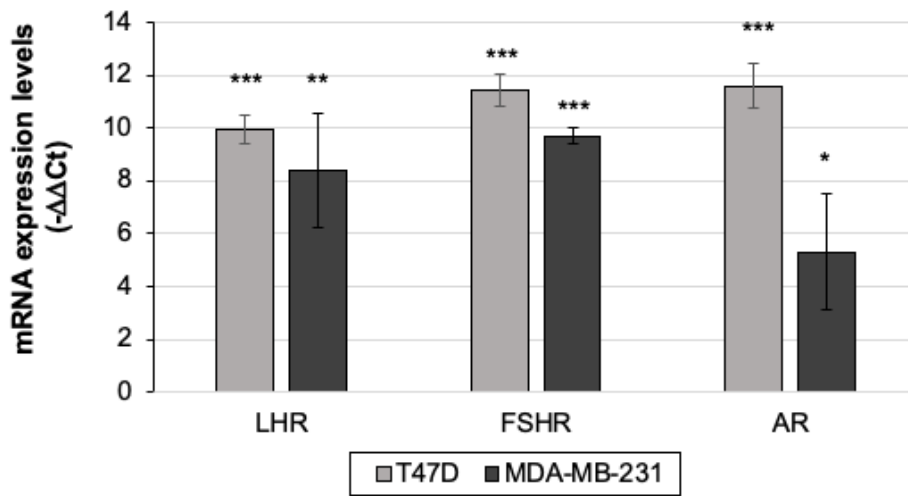

**Supplementary Figure 1:** mRNA expression levels of LHR, FSHR, and AR expressed as “-delta delta Ct” in relation to the housekeeping gene expression levels (RpLp0) in T47D and MDA-MB-231 cells relative to the pancreatic ductal adenocarcinoma cell line PaCa44, used as control. Values are the means ( $\pm$  SD) of three independent biological replicates. Statistical legend:  $p < 0.001$  (\*\*\*)

T47D or MDA-MB-231 cells relatively to PaCa44 cells.

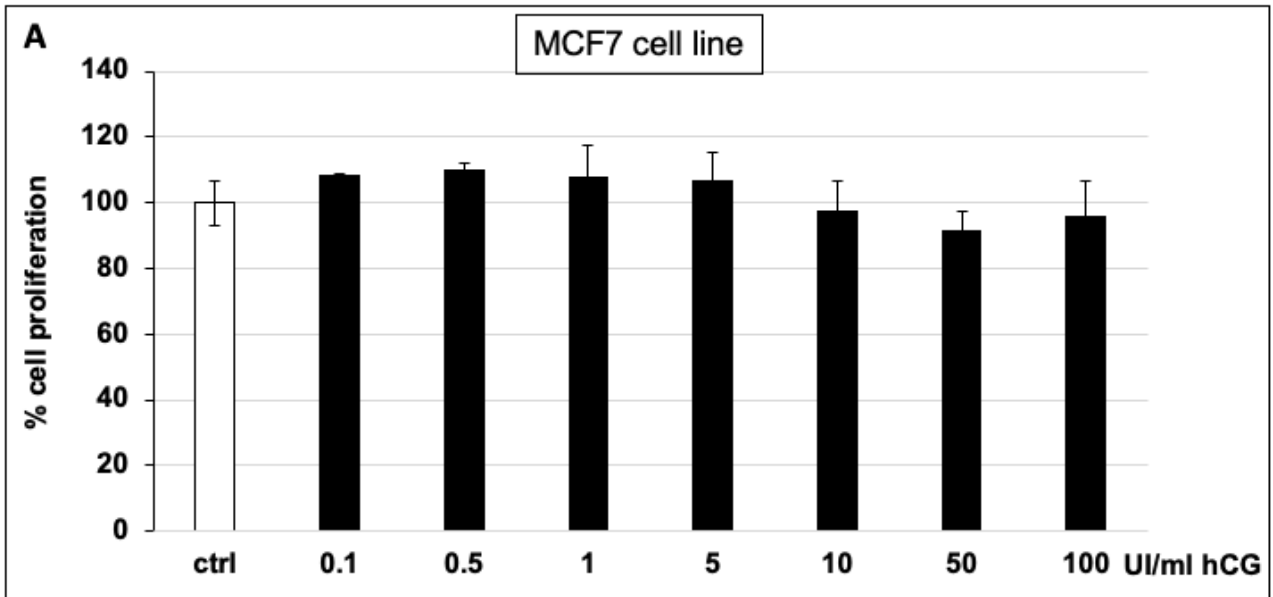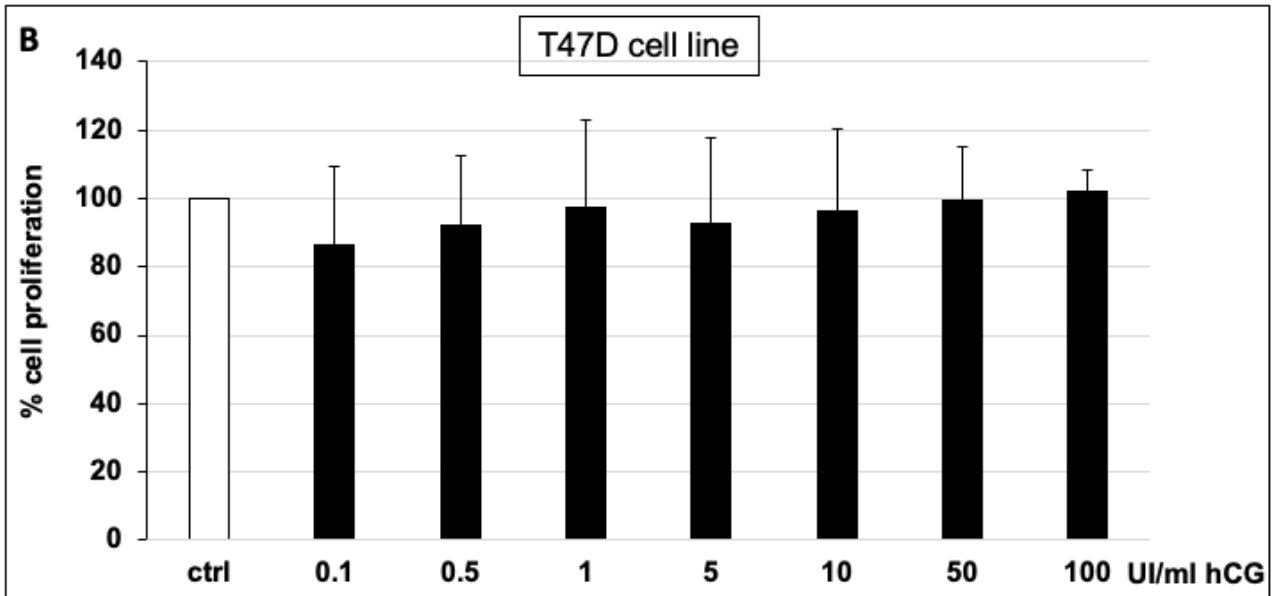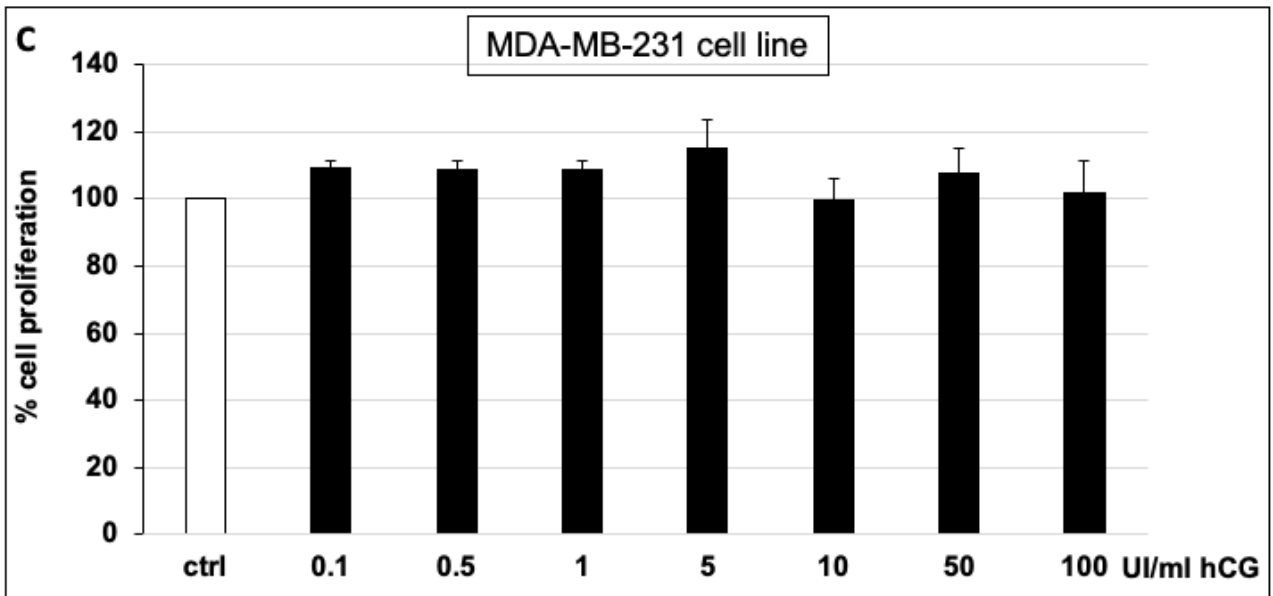

Supplementary Figure 2

**Supplementary Figure 2:** Cell proliferation of MCF7 (A), T47D (B), and MDA-MB-231 (C) cultured in FBS-complete medium and treated with 0.1, 0.5, 1, 5, 10, 50, and 100 UI/ml hCG for 72 hours.

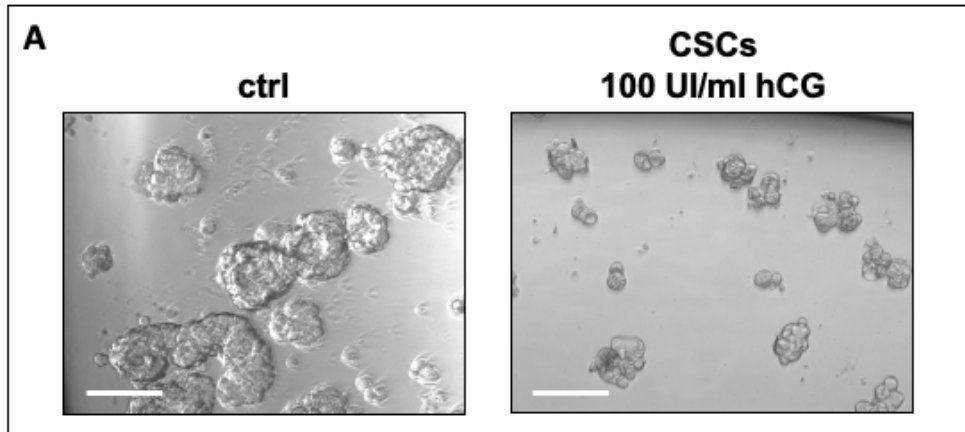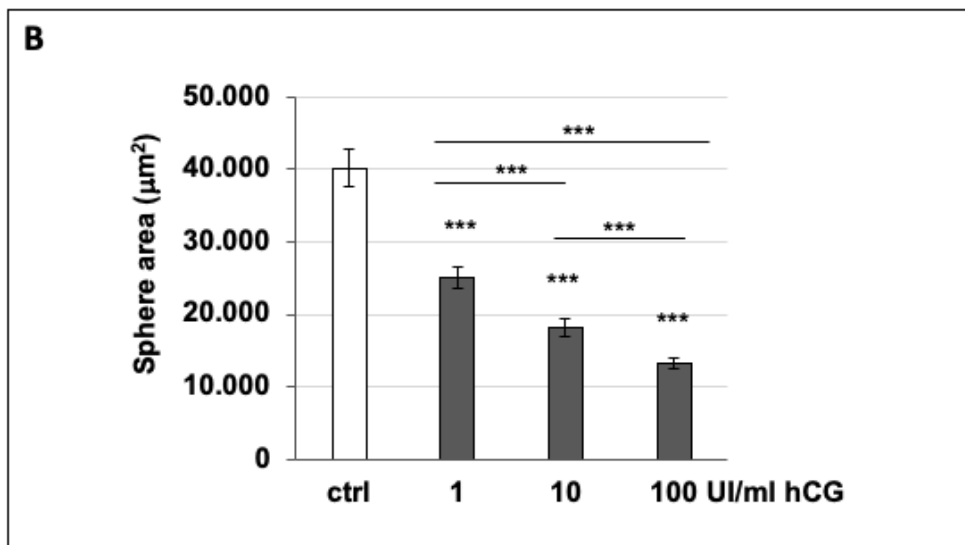

**Supplementary Figure 3**

**Supplementary Figure 3:** Representative images (A) and quantification of the sphere area of untreated MCF7 CSCs (control) and treated with 100 UI/ml hCG for 48 h (B). Scale bar: 50  $\mu\text{m}$ . Values are the means ( $\pm$  SD) of three independent biological replicates. Statistical legend:  $p < 0.5$  (\*),  $p < 0.01$  (\*\*),  $p < 0.001$  (\*\*\*) of treated CSCs relative to untreated MCF7 CSCs (control).
